# Supplementary material
Source: PubMed Central journal article supplement (PMC3106186)
Supplement: supp_btr190_bioinf-2011-0138-File002.pdf [file supp_btr190_bioinf-2011-0138-File002.pdf]

## Supplementary information to

# Signaling Gateway Molecule Pages – a data model perspective

Ashok Reddy Dinasarapu<sup>1</sup>, Brian Saunders<sup>4</sup>, Iley Ozerlat<sup>5</sup>, Kenan Azam<sup>4</sup> and Shankar Subramaniam<sup>1,2,3,4,\*</sup>

<sup>1</sup>Department of Bioengineering, <sup>2</sup>Department of Chemistry and Biochemistry, <sup>3</sup>Department of Cellular and Molecular Medicine, <sup>4</sup>San Diego Super Computer Center, University of California San Diego, 9500 Gilman Drive, La Jolla, CA 92093, <sup>5</sup>Nature Publishing Group, The Macmillan Building, 4 Crinan Street, London N1 9XW, UK.

### MOLECULE PAGE DETAILS:

Though molecule pages can be assigned to sequences of any species, only those with mouse sequences can have author annotation. This limitation is due to the origin of the SGMP as part of the Alliance for Cellular Signaling (Gilman et al, 2002) – which used the mouse cell as a basis for the experiments. In practice, many of the molecule pages contain information derived from other species than the mouse, so viewing the SGMP as hybrid model is more accurate. Removing the mouse sequence limitation, and presenting the data based on homologous groups, is a future goal of the SGMP.

Automated data for each molecule page gets updated at least once a month. As of now, all published molecule pages only have one version. Extending our system to allow for updated versions is a feature we plan on adding in 2011.

Table S1: **Molecule page categories.** Presently there are 4017 molecule pages (from 3992 genes) and 655 published as of March 4, 2011, all assigned to a specific in-house category. **Note:** The sequence section of a molecule page and the BioPAX export file have complete Gene Ontology (GO) annotation details, which gives complete details on a gene function, process and compartment.

| S.No | Molecule Page Category         | Total Molecule Pages | Published |
|------|--------------------------------|----------------------|-----------|
| 1    | Actin binding protein          | 28                   | 4         |
| 2    | Activator protein              | 29                   | 5         |
| 3    | Adaptor/scaffold               | 196                  | 40        |
| 4    | Adenylyl cyclase               | 10                   | 5         |
| 5    | Adhesin/agglutinin             | 96                   | 15        |
| 6    | Apoptosis                      | 12                   | 3         |
| 7    | Calcium-binding protein        | 52                   | 17        |
| 8    | Cell surface, <i>misc.</i>     | 129                  | 18        |
| 9    | Channel, calcium               | 44                   | 7         |
| 10   | Channel, cation                | 28                   | 8         |
| 11   | Channel, chloride              | 4                    | 0         |
| 12   | Channel, <i>misc.</i>          | 12                   | 0         |
| 13   | Channel, potassium             | 70                   | 1         |
| 14   | Channel, sodium                | 21                   | 2         |
| 15   | Chaperone                      | 17                   | 8         |
| 16   | Chemokine                      | 32                   | 1         |
| 17   | Contractile protein            | 14                   | 0         |
| 18   | Cytokine                       | 36                   | 0         |
| 19   | Cytoskeletal protein           | 106                  | 8         |
| 20   | Cytosolic, <i>misc.</i>        | 213                  | 43        |
| 21   | DNA binding protein            | 8                    | 0         |
| 22   | Dystrophin complex             | 17                   | 0         |
| 23   | Enzyme, <i>misc.</i>           | 35                   | 5         |
| 24   | Extracellular matrix           | 17                   | 1         |
| 25   | G protein, heterotrimeric      | 34                   | 12        |
| 26   | G protein, monomeric (non-Rab) | 69                   | 24        |
| 27   | G protein, Rab                 | 55                   | 12        |
| 28   | GTPase activating protein, ARF | 28                   | 7         |

|    |                                                  |     |    |
|----|--------------------------------------------------|-----|----|
| 29 | GTPase activating protein, misc.                 | 9   | 1  |
| 30 | GTPase activating protein, Rac/Rho               | 18  | 4  |
| 31 | GTPase activating protein, Ras                   | 9   | 0  |
| 32 | GTPase activating protein, RGS                   | 23  | 12 |
| 33 | Guanine nucleotide exchange factor, ARF          | 9   | 0  |
| 34 | Guanine nucleotide exchange factor, <i>misc.</i> | 14  | 3  |
| 35 | Guanine nucleotide exchange factor, Rab          | 5   | 1  |
| 36 | Guanine nucleotide exchange factor, Rac/Rho      | 40  | 10 |
| 37 | Guanine nucleotide exchange factor, Ras          | 9   | 3  |
| 38 | Guanylyl cyclase                                 | 4   | 1  |
| 39 | Hydrolase, esterase                              | 12  | 0  |
| 40 | Hydrolase, non-esterase                          | 9   | 5  |
| 41 | Immunoglobulin superfamily                       | 32  | 0  |
| 42 | Inhibitor protein                                | 68  | 11 |
| 43 | Isomerase                                        | 5   | 2  |
| 44 | Kinase (non-protein)                             | 27  | 3  |
| 45 | Kinase, lipid                                    | 46  | 7  |
| 46 | Ligand, GPCR                                     | 7   | 1  |
| 47 | Ligand, receptor tyrosine kinase                 | 43  | 3  |
| 48 | Lipid binding protein                            | 34  | 2  |
| 49 | Lipid modification, protein                      | 15  | 7  |
| 50 | Lyase                                            | 2   | 0  |
| 51 | Motor protein                                    | 16  | 1  |
| 52 | Myosin binding protein                           | 20  | 0  |
| 53 | Nuclear, <i>misc.</i>                            | 59  | 5  |
| 54 | Oxidoreductase                                   | 33  | 9  |
| 55 | Phosphatase                                      | 3   | 1  |
| 56 | Phosphatase (non-protein)                        | 52  | 4  |
| 57 | Phosphatase, lipid                               | 6   | 0  |
| 58 | Phosphodiesterase                                | 23  | 12 |
| 59 | Phospholipase                                    | 35  | 4  |
| 60 | Phosphorylase                                    | 3   | 0  |
| 61 | Protease (non-proteasomal)                       | 62  | 1  |
| 62 | Protease (proteasomal subunit)                   | 41  | 7  |
| 63 | Protein kinase, dual-specificity                 | 28  | 15 |
| 64 | Protein kinase, Ser/Thr                          | 59  | 10 |
| 65 | Protein kinase, Ser/Thr (non-receptor)           | 273 | 67 |
| 66 | Protein kinase, tyrosine (non-receptor)          | 39  | 11 |
| 67 | Protein phosphatase, dual-specificity            | 42  | 7  |
| 68 | Protein phosphatase, Ser/Thr                     | 1   | 0  |
| 69 | Protein phosphatase, Ser/Thr (non-receptor)      | 60  | 2  |
| 70 | Protein phosphatase, tyrosine (non-receptor)     | 24  | 2  |
| 71 | Receptor, cytokine                               | 63  | 3  |
| 72 | Receptor, GPCR                                   | 219 | 47 |
| 73 | Receptor, guanylyl cyclase                       | 6   | 2  |
| 74 | Receptor, ligand-gated channel                   | 65  | 2  |
| 75 | Receptor, <i>misc.</i>                           | 90  | 33 |
| 76 | Receptor, nuclear (transcription factor)         | 26  | 1  |
| 77 | Receptor, protein phosphatase, tyrosine          | 19  | 1  |
| 78 | Receptor, protein translocating                  | 2   | 0  |
| 79 | Receptor, Ser/Thr kinase                         | 13  | 3  |
| 80 | Receptor, tyrosine kinase                        | 56  | 1  |

|    |                                        |     |    |
|----|----------------------------------------|-----|----|
| 81 | RNA binding protein                    | 29  | 1  |
| 82 | Secreted protein                       | 123 | 10 |
| 83 | Transcription factor                   | 131 | 17 |
| 84 | Transcription; coactivator/corepressor | 46  | 7  |
| 85 | Transferase                            | 15  | 5  |
| 86 | Translation, protein                   | 9   | 2  |
| 87 | Transporter, ABC                       | 52  | 5  |
| 88 | Transporter, active                    | 34  | 4  |
| 89 | Transporter, facilitator               | 188 | 17 |
| 90 | Ubiquitin conjugating system           | 23  | 3  |
| 91 | Vesicle protein                        | 77  | 11 |

Table S2: **SGMP proteins present in signaling pathways from the KEGG database.**

Kegg\_total: KEGG total genes (includes orthologs, predicted, pseudo and hypothetical), Kegg\_mouse: KEGG total genes (excludes orthologs, predicted, pseudo and hypothetical), Sgmp\_total: SGMP total genes and Sgmp\_published: SGMP published pages (as of March 4, 2011).

| S.No | KEGG Pathway ID | KEGG Pathway Name                     | Kegg_total | Kegg_mouse | Sgmp_total | Sgmp_published |
|------|-----------------|---------------------------------------|------------|------------|------------|----------------|
| 1    | path:mmu04010   | MAPK signaling pathway                | 269        | 264        | 247        | 54             |
| 2    | path:mmu04020   | Calcium signaling pathway             | 178        | 177        | 164        | 37             |
| 3    | path:mmu04062   | Chemokine signaling pathway           | 188        | 177        | 166        | 31             |
| 4    | path:mmu04310   | Wnt signaling pathway                 | 154        | 150        | 127        | 25             |
| 5    | path:mmu04722   | Neurotrophin signaling pathway        | 132        | 129        | 117        | 25             |
| 6    | path:mmu04912   | GnRH signaling pathway                | 99         | 98         | 90         | 22             |
| 7    | path:mmu04660   | T cell receptor signaling pathway     | 112        | 110        | 101        | 20             |
| 8    | path:mmu04662   | B cell receptor signaling pathway     | 76         | 74         | 73         | 17             |
| 9    | path:mmu04910   | Insulin signaling pathway             | 137        | 132        | 117        | 17             |
| 10   | path:mmu04370   | VEGF signaling pathway                | 76         | 74         | 71         | 14             |
| 11   | path:mmu04012   | ErbB signaling pathway                | 87         | 86         | 81         | 16             |
| 12   | path:mmu04664   | Fc epsilon RI signaling pathway       | 80         | 77         | 73         | 18             |
| 13   | path:mmu04350   | TGF-beta signaling pathway            | 85         | 84         | 59         | 13             |
| 14   | path:mmu04620   | Toll-like receptor signaling pathway  | 101        | 100        | 87         | 11             |
| 15   | path:mmu04070   | Phosphatidylinositol signaling system | 78         | 77         | 70         | 8              |
| 16   | path:mmu04150   | mTOR signaling pathway                | 53         | 48         | 45         | 8              |
| 17   | path:mmu04340   | Hedgehog signaling pathway            | 54         | 54         | 43         | 7              |
| 18   | path:mmu04115   | p53 signaling pathway                 | 70         | 68         | 41         | 6              |
| 19   | path:mmu04621   | NOD-like receptor signaling pathway   | 62         | 60         | 37         | 7              |
| 20   | path:mmu04630   | Jak-STAT signaling pathway            | 153        | 148        | 119        | 4              |
| 21   | path:mmu04920   | Adipocytokine signaling pathway       | 68         | 68         | 54         | 5              |
| 22   | path:mmu04622   | RIG-I-like receptor signaling pathway | 69         | 68         | 42         | 6              |
| 23   | path:mmu03320   | PPAR signaling pathway                | 81         | 81         | 32         | 1              |
| 24   | path:mmu04330   | Notch signaling pathway               | 51         | 51         | 21         | 1              |
| 25   | path:mmu02010   | ABC transporters                      | 45         | 45         | 45         | 5              |
| 26   | path:mmu04512   | ECM-receptor interaction              | 86         | 84         | 56         | 8              |
| 27   | path:mmu04742   | Taste transduction                    | 60         | 58         | 23         | 4              |
| 28   | path:mmu04110   | Cell cycle                            | 128        | 125        | 74         | 12             |
| 29   | path:mmu05014   | Amyotrophic lateral sclerosis (ALS)   | 56         | 55         | 41         | 5              |

## STATES:

### State Naming

The following rules are used to create a state name in order to preserve continuity across all published molecule pages. For example: "ProA/ProB-P2 (nuc)" represents Protein A bound to Protein B (phosphorylated twice with the state existing in the nucleus).

- (1) The first letter of the protein is capitalized, with subsequent letters in lowercase.
- (2) If the protein name contains a number, then the space or dash that normally separates the number from the name is removed.
- (3) Post-translational modifications are represented as a short code (see Table S5). The modification code follows the protein name and is separated by a dash ('-') as in ProB-P.
- (4) Multiple modifications are separated by dashes and appear after the protein name.
- (5) If the protein contains two or more of the same modifications, then the modification code is followed by the number of modifications.
- (6) Ligands are listed in the same way as post-translational modifications. All common abbreviations for the ligand name are used (e.g. GTP, PIP3).
- (7) Short code that corresponds to cellular location appears in parentheses after the state name (see Table S6). Cellular localization is not listed in all state names. However, if a state shuttles between two or more locations, it helps to clarify the state transition network map.
- (8) A backslash is used to separate proteins in the state name.
- (9) If a protein exists as a dimer or multimer, then the state name is enclosed in parentheses, and the number of monomers is added before the first parenthesis.
- (10) If a state name exceeds the character limit (30), then cellular location or post-translational modifications are removed from the name or protein names are shortened.
- (11) Greek letters are acceptable in protein names.

Table S3. **State names with description.** States capture information about protein-protein and protein-small molecule interactions, post-translational modifications and changes in cellular location.

| Sr.No | State Name             | Description                                                                                                      |
|-------|------------------------|------------------------------------------------------------------------------------------------------------------|
| 1     | NTPDase8-G4            | NTPDase8 that has been glycosylated 4 times                                                                      |
| 2     | 2(TgfbRI-P)            | phosphorylated TGF beta receptor type I dimer                                                                    |
| 3     | Rsk1-P4/Erk1-P2/Pdk1-P | Rsk1 that has been phosphorylated 4 times, bound to diphosphorylated Erk1 and monophosphorylated Pdk1            |
| 4     | Kras-GG-proteo-Me-GTP  | GTP-bound K-Ras that is bound to a geranylgeranyl isoprenoid and has been proteolytically cleaved and methylated |

Some key features of a molecule page state are:

1. State is either a Protein or a Complex molecule.
2. If Protein, it may associate with one or more modifications and/or cellular location.
3. If Complex, it may be associated with one or more proteins, small molecules, complexes and/or class molecules, and may also associate with one or more modifications and/or cellular location.
4. Stoichiometry is included in a state when it is used as a catalyst or in other functions, since the state is created with stoichiometric details.

Table S4: **A molecule state may associate with one or more of the following five types of functions.** Nuclear receptors may function as receptors and transcription factors and receptor tyrosine kinases may function both as an enzyme and as a receptor.

| S.No | State Name                 | Function             | SGMP_ID | STATE_ID |
|------|----------------------------|----------------------|---------|----------|
| 1    | 4(Trpc7)[2]                | Channel              | A002418 | 20261    |
| 2    | (Lcmt1)                    | Enzyme               | A003167 | 18449    |
| 3    | (Aplnr 2G)                 | Receptor             | A000304 | 15611    |
| 4    | (Pknx1) (Hoxb1) (Pbx[1-4]) | Transcription Factor | A004115 | 25250    |
| 5    | (Abca1-2ATP)               | Transporter          | A002593 | 10440    |

Table S5: **Some covalent modifications and corresponding codes used in state names.**

| S.No | Covalent Modification  | Code |
|------|------------------------|------|
| 1    | Phosphorylation        | P    |
| 2    | Glycosylation          | G    |
| 3    | O-linked Glycosylation | O(G) |
| 4    | Methylation            | Me   |
| 5    | Myristoylation         | M    |
| 6    | Palmitoylation         | PA   |

|    |                     |        |
|----|---------------------|--------|
| 7  | Farnesylation       | F      |
| 8  | Geranylgeranylation | GG     |
| 9  | Phosphatidic acid   | PhtAc  |
| 10 | Ubiquitination      | Ub     |
| 11 | Sumoylation         | Sumo   |
| 12 | Proteolysis         | Proteo |

Table S6: **Some of the cellular locations and corresponding codes used in state names.** Cellular locations are mapped to their respective GO term.

| S.No | Cellular Location     | Code    |
|------|-----------------------|---------|
| 1    | Nucleus               | (nuc)   |
| 2    | Cytoplasm             | (cyto)  |
| 3    | Endoplasmic reticulum | (ER)    |
| 4    | Golgi                 | (Golgi) |
| 5    | Plasma membrane       | (PM)    |
| 6    | Secreted              | (sec)   |

#### STATE TRANSITIONS:

Based on the components, modifications and localization differences between the two states, state transitions are classified under the following categories and appropriate kinetic parameters (see STATE FUNCTIONS) are provided. The categories are

1. Ligand association/dissociation
2. Protein association/dissociation
3. Intrinsic enzyme activity
4. Addition/removal of covalent modification
5. Change of cellular localization and
6. Multiple modification

Further, state transition differences (computed differences) are calculated by comparing the starting and ending state signatures. To calculate computed differences, each state is considered as a *complex* with *complex components* like proteins and/or class molecules with associated modifications, small molecule binding and cellular location.

#### STATE FUNCTIONS:

A state may associate with one or more of the following functions. Not all protein states are associated/defined with functions in molecule pages; for example, *scaffolds/adaptor* proteins, *binding* proteins, *RGS* proteins and *small GTPases*. These proteins regulate signal transduction by localizing pathway components or mediating specific protein-protein interactions (Pawson and Scott, 1997).

#### Channel Function

Channels are trans-membrane protein complexes (states) found in the lipid bilayer membranes (Brown, 1993). These channels allow permeation of specific ions/molecules and the majority of channels are defined with respect to how and/or what opens and closes the channels. Thermodynamic data as shown in Table S7 is provided for ion channels. *Voltage-gated* ion channels, like cation channels, open or close depending on the voltage gradient (potential change) across the membrane. *Ligand-gated* ion channels open or close depending on binding of ligands to the channel. Examples of ligand gated channels are nicotinic acetylcholine receptor, the  $\gamma$ -aminobutyric acid receptors, glycine receptor *etc.*

Table S7. **The channel function is associated with the following thermodynamic data.** Ion channels exist in different conformational states, including an open state, which permits ions through the pore, or a closed state. The transition between these states is often called ion channel gating, and it is influenced by a number of different factors.

| Sr.No | Parameter                | Units              | Description                                |
|-------|--------------------------|--------------------|--------------------------------------------|
| 1     | <i>Tau open</i>          | <i>milli sec</i>   | mean channel open time                     |
| 2     | <i>Tau close</i>         | <i>milli sec</i>   | mean channel close time                    |
| 3     | Activation gating        | <i>milli volts</i> |                                            |
| 4     | Inactivation gating      | <i>milli volts</i> |                                            |
| 5     | Inactive gate time const | <i>milli sec</i>   |                                            |
| 6     | I.V curve                | -                  | current-voltage properties                 |
| 7     | <i>Channel Ion</i>       | -                  | small molecule                             |
|       | <i>conductance</i>       | <i>pS</i>          | pico-siemens, measure of current (in amps) |

|   |                    |      |                                                   |
|---|--------------------|------|---------------------------------------------------|
|   | $\gamma$ value     | $pS$ | divided by voltage (in volts)                     |
|   | $\gamma$ max value | $pS$ | average conductance                               |
| 8 | Ionic selectivity  | -    | maximum average conductance                       |
| 9 | Blocker            | -    | list of <i>Channel ion</i> with selectivity order |
|   |                    |      | protein or small molecule ( ionic or other)       |

The channel *ionic selectivity* is defined by a list of channel ions with selectivity order. A channel ion is a *small molecule* with *conductance* details. A *channel blocker* is categorized into a protein or a *small molecule* that interferes with the entry of a channel ion into the cell through the membrane. Some ligand-gated channels are associated with receptor activity, for example *Inositol 1,4,5-triphosphate (InsP<sub>3</sub>)* receptor is associated with Ca<sup>2+</sup> channel on the endoplasmic reticular membrane.

### Enzyme Function

A state's enzymatic/catalytic activity is represented as a reaction with substrate kinetic parameters. Each reaction has reaction components (reactants and products) which are either proteins (states) and/or small molecules with stoichiometry. Two types of kinetic models, *Michaelis-Menten* and *Co-operative*, are available as in Table S8. Examples of enzymes include kinases, phosphatases, phospholipases *etc.*

Table S8. **Enzyme kinetic parameters with units and description.** Enzyme kinetics gives information on how enzymes bind substrates and turn them into products.

| Sr.No | Parameter                 | Units            | Description                                                |
|-------|---------------------------|------------------|------------------------------------------------------------|
| 1     | Kinetic Pattern           | -                | Michaelis-Menten / Positive Cooperativity                  |
| 2     | $K_m$                     | $\mu mol$        | Michaelis-Menten Constant                                  |
| 3     | $K_{prime}$               | $\mu mol$        | analogous to $K_m$ in cooperative binding                  |
| 4     | <i>Hill coefficient</i>   | -                | cooperativity factor                                       |
| 5     | $V_{max}$                 | $\mu mol/min/mg$ | maximum enzyme velocity                                    |
| 6     | $k_{cat}$                 | <i>per sec</i>   | maximum number of enzymatic reactions catalyzed per second |
| 7     | Observed rate ( $V_o$ )   | $\mu mol/min/mg$ |                                                            |
| 8     | Substrate conc. ( $[S]$ ) | $\mu mol$        |                                                            |

A catalytic state may associate with one or more reactions or a particular reaction might be carried out by more than one catalyst (second one is called reference enzyme), quantitative data is displayed where available in peer reviewed literature. In the latter case the activity of the function is defined as a percentage of the activity of the old function (*relative activity*). These values can be positive or negative. If the relative activity is greater than 1 then the new function activity is represented as '*increase (relative activity-1.00) fold*'. If it is less than 1 then the new function activity is '*decrease (1.00 - relative activity)\*100 percent*'. Receptor tyrosine kinases may function both as an enzyme and as a receptor. All intrinsic enzymatic reactions of a state are described in process data of state transitions section.

### Receptor Function

A receptor may be embedded in the membrane in an insoluble form or in a soluble state when localized in the cytoplasm/nucleus of a cell (Gutkind, 1998; Gutkind, 1998). The receptor will be activated upon binding of a specific kind of signaling molecule called a *ligand*. This ligand is a protein in a specified state or a small molecule which may bind to the extracellular domain of a transmembrane receptor or enter into the cell and bind to intracellularly localized receptors. Examples of receptors include transmembrane (G-protein coupled) receptors, cell surface receptors, receptor tyrosine kinases and nuclear receptors. Receptor-ligand binding efficiency is described by estimating the rate constants and/or dissociation constants from experimental kinetic or equilibrium data (see Table S9).

Table S9. **Receptor-Ligand kinetic parameters with units and description.** Some states are associated with receptor activity. Ligand may be either a state or a small molecule. The life span of the receptor-ligand complex is controlled primarily by the dissociation rate of the bound ligand.

| Sr.No | Parameter                                    | Units     | Description                               |
|-------|----------------------------------------------|-----------|-------------------------------------------|
| 1     | Ligand                                       | -         | either a state or a small molecule        |
| 2     | <i>Stoichiometry</i>                         | -         | number of binding sites                   |
| 3     | <i>Dissociation constant (K<sub>d</sub>)</i> | $\mu mol$ | affinity between a ligand and receptor    |
| 4     | <i>Hill coefficient</i>                      | -         | cooperativity factor in a binding process |

Not every ligand that binds to a receptor activates the receptor. Based on the ligand's role on receptor activation, ligands are classified. AGONISTS are able to activate the receptor and result in a maximal biological response. Most natural ligands are full agonists. PARTIAL AGONISTS do not activate receptors fully, causing responses which are partial compared to those of full agonists. ANTAGONISTS bind to receptors but do not activate them, this result in receptor blockage, inhibiting the binding of other agonists. INVERSE AGONISTS reduce the activity of receptors by inhibiting their constitutive activity. The receptor tyrosine kinases may function as both an enzyme and as a receptor. Nuclear receptors may function as receptors and transcription factors (ligand-controlled transcription factors).

### Transcription Factor Function

The primary controlling factors of the gene transcriptional activity are called transcription factors (TFs), which bind to *cis-acting* DNA sequences and thereby influence the transcription process (Brivanlou and Darnell, 2002; Mitchell and Tjian, 1989). Each TF function is associated with a list of regulated *target genes* and information on the bound DNA sequence. *Bound DNA sequence* is represented by using IUPAC nucleotide ambiguity codes (Cornish-Bowden, 1985). Each TF modulates transcription of *one or more* target genes, and if a TF's target modulated gene list contains *two or more* same family genes with the same recognition sequence then a *class molecule* is assigned as a target. The TFs can exert a negative or positive influence on gene transcription upon binding to their DNA sequence and this effect is represented in molecule pages as *regulation type* which is either UP, DOWN or NO CHANGE. In order to attain full stimulatory activity sometimes the TFs themselves require the aid of further protein factors, known as *effectors* - which are either activators or repressors (Thomas and Chiang, 2006; Xu, et al., 1999). This class of proteins is represented as transcription factor, coactivators/corepressors.

### Transporter Function

A transporter is a transmembrane protein complex that helps a certain substances (proteins or small molecules) to cross the membrane by facilitated diffusion or active transport (Pajor, 1999; Palacin, et al., 1998). Examples of transporters include glucose transporters and sodium/potassium ATPases. If two states have similar transporter function and kinetic parameter data (Table S10) then the new function activity is expressed as a percentage of the activity of the old function (similar to reference enzyme activity mentioned in Enzyme function section).

Table S10. **Transporter function with substrate kinetic parameters.** The transporter state may assist in the movement of substances by facilitated diffusion or active transport across the membrane.

| Sr.No | Parameter                    | Units             | Description                                                                      |
|-------|------------------------------|-------------------|----------------------------------------------------------------------------------|
| 1     | <i>Stoichiometry</i>         | -                 | number of cycles/times that substrate molecules, passing through the transporter |
| 2     | <i>Turnover number</i>       | <i>cycles/min</i> |                                                                                  |
| 3     | <i>K<sub>m</sub>_inside</i>  | <i>μmol</i>       |                                                                                  |
| 4     | <i>K<sub>m</sub>_outside</i> | <i>μmol</i>       |                                                                                  |
| 5     | <i>Common direction</i>      | -                 | in/out                                                                           |
| 6     | <i>Electrogenic</i>          | -                 | yes/no                                                                           |
| 7     | <i>ATPase</i>                | -                 | yes/no                                                                           |
| 8     | <i>K<sub>m</sub>_atp</i>     | <i>μmol</i>       |                                                                                  |

### CLASS MOLECULE:

A *class molecule* (also called Protein Class) is a set of two or more protein molecules with sequence and/or functional homology that behave similarly in the context of states, transitions and functions. To create a class molecule, a protein should interact with two or more member proteins of the family. A class molecule does not need to include all *homologs* of a protein family if the molecule has not been demonstrated to interact with a given protein (see Table S11). The use of a class molecule permits the creation of interactions between a protein molecule and each member of the protein class simultaneously by creating a single state that represents the prototypical complex. Therefore, class molecules are not the same thing as protein complexes. The class molecule is represented with a '*Stem Grouping*' method. This tries to group proteins based on a common symbol stem and then collapses the suffixes, producing something much shorter than simply enumerating the components. For example (Gnb1 | Gnb2 | Gnb3 | Gnb4) class molecule is represented by Gnb[1-4] and (Sfn | Ywhaz | Ywhab | Ywhae | Ywhah | Ywhag | Ywhaq) is represented by Sfn | Ywha[b,e,g,h,q,z].

Table S11: **Class Molecules / Protein Classes of RGS family members.** These class molecules are classified as SGMP defined and AUTHOR defined. SGMP defined class molecules generally contain all the members of the protein family and AUTHOR defined contains limited number of protein members with known interactions.

| S.No | Name                         | Description          | Class Type |
|------|------------------------------|----------------------|------------|
| 1    | Rgs[1,3-4]                   | RGS protein          | AUTHOR     |
| 2    | Rgs[1,4,7,11,14,16,19-20]    | RGS proteins (Go)    | AUTHOR     |
| 3    | Rgs[1,4,7,11,14,16-17,19-20] | RGS proteins (Go)    | AUTHOR     |
| 4    | Rgs[1-2,4-5,8,13,16,19]      | R4 family of the RGS | AUTHOR     |
| 5    | Rgs[1-4,18-19]               | RGS                  | AUTHOR     |
| 6    | Rgs[1-5,10,12-14,16-20]      | RGS                  | AUTHOR     |

|    |                           |                                |        |
|----|---------------------------|--------------------------------|--------|
| 7  | Rgs[1-5,7-8,13,16-18]     | RGS proteins (Gq)              | AUTHOR |
| 8  | Rgs[1-5,7-8,13,16-19]     | RGS proteins (Gq)              | AUTHOR |
| 9  | Rgs[1-5,7-8,13,16-20]     | RGS proteins (Gq)              | AUTHOR |
| 10 | Rgs[1-5,8,10,12-14,16-20] | RGS family 1 (canonical RGS's) | SGMP   |
| 11 | Rgs[1-5,8,13,16,18,21]    | R4 RGS family                  | AUTHOR |
| 12 | Rgs[1-5,8,13,16,18]       | RGS                            | AUTHOR |
| 13 | Rgs[1-5,8,13,16,19]       | R4 family of the RGS           | AUTHOR |
| 14 | Rgs[2-5,7-8,13,16-18]     | RGS proteins (Gq)              | AUTHOR |
| 15 | Rgs[2-5,8,13,16,18]       | R4 RGS family                  | AUTHOR |
| 16 | Rgs[4,10,17,19-20]        | Gz RGSs                        | AUTHOR |
| 17 | Rgs[5,7-8,13,16-17]       | RGS proteins (Gq)              | AUTHOR |
| 18 | Rgs[5,8,13,16-17]         | RGS proteins (Gq)              | AUTHOR |
| 19 | Rgs[6-7,9,11]             | RGS family 2 (R7 members)      | SGMP   |
| 20 | Rgs1[0,7]   Rgs20         | Gz RGSs                        | AUTHOR |
| 21 | Rgs1[2,4]                 | RGS12,14                       | AUTHOR |
| 22 | Rgs1[7,9]   Rgs20         | Gz binding RGSs                | AUTHOR |

#### DATA EXPORT:

BioPAX provides more detailed information on individual entities and interactions, while SBML is targeted at modeling dynamic biochemical networks that are described by reactions. Furthermore, by using BioPAX level3 format one can also visualize, process and manipulate data through other external network visualization/analysis software, such as Cytoscape (Shannon, et al., 2003) (see Fig S1 and Table S12).

Table S12: **Some BioPAX level3 classes used to define SGMP data.** BioPAX is an abstract data (ontology) model to describe all biological processes. BioPAX provides more detailed information on individual entities and interactions.

| S.No | SGMP Term                               | BioPAX Term                                                     |
|------|-----------------------------------------|-----------------------------------------------------------------|
| 1    | State                                   | Protein / Complex                                               |
| 2    | Transition                              | pathwayStep                                                     |
| 3    | Transition Network                      | Pathway                                                         |
| 4    | Protein/Ligand association/dissociation | ComplexAssembly                                                 |
| 5    | Change of Cellular Location             | Transport                                                       |
| 6    | Channel/Transporter function            | Transport                                                       |
| 7    | Enzymatic/Catalytic reaction            | Catalysis                                                       |
| 8    | Transcription Factor Function           | TemplateReactionRegulation                                      |
| 9    | Class Molecule / Protein Class          | Protein (ProteinReference with a list of memberReferenceEntity) |



Fig S1: G Protein alpha 12 (A000039) molecule page state transition network at Cytoscape 2.7.0.

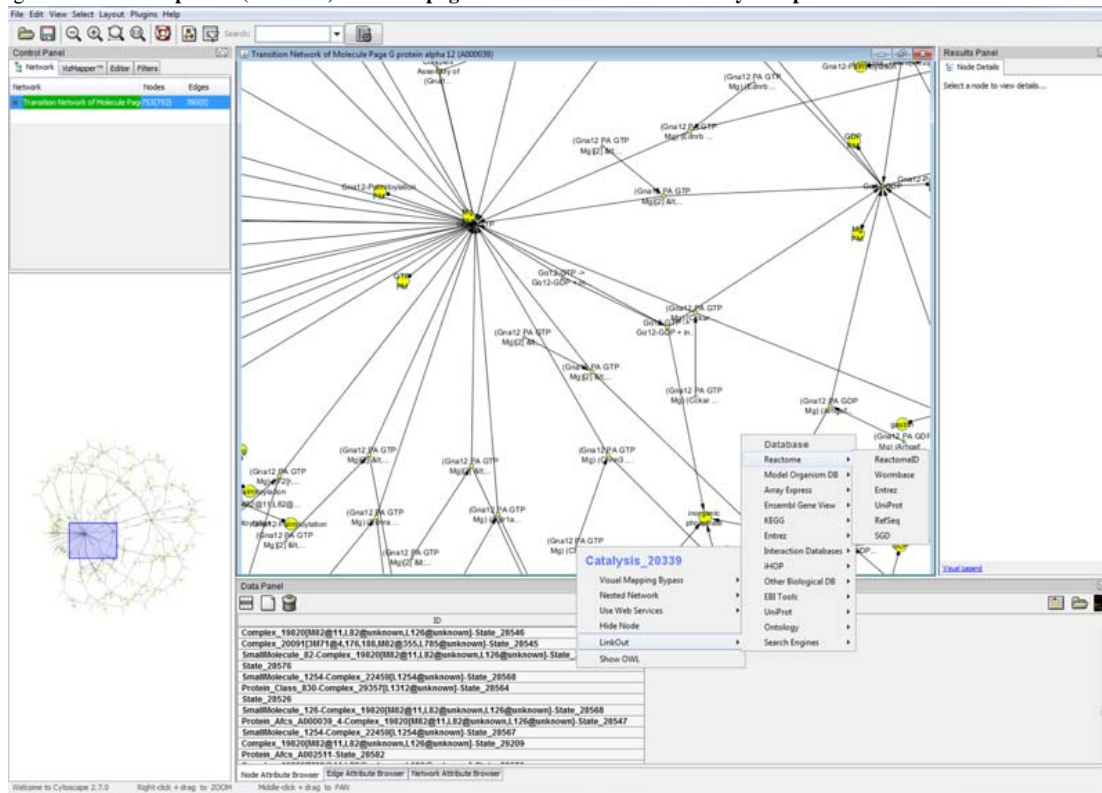

The above Fig S1 was generated by exporting SGMP BioPAX file for 'G Protein alpha 12' and then importing it into Cytoscape. The figure demonstrates the utility of SGMP data to facilitate visualization and analysis using Cytoscape, which is the definitive pathway analysis resource in the community. Once, exported the SGMP initialized Cytoscape graph can be enriched further by adding pathway data from another database or vice versa.

## References

- Brown, A.M. (1993) Membrane-delimited cell signaling complexes: direct ion channel regulation by G proteins, *J Membr Biol*, **131**, 93-104.
- Gilman, A.G. *et al.* (2002) Overview of the Alliance for Cellular Signaling, *Nature*, **420**, 703-706.
- Gutkind, J.S. (1998) Cell growth control by G protein-coupled receptors: from signal transduction to signal integration, *Oncogene*, **17**, 1331-1342.
- Gutkind, J.S. (1998) The pathways connecting G protein-coupled receptors to the nucleus through divergent mitogen-activated protein kinase cascades, *Journal of Biological Chemistry*, **273**, 1839-1842.
- Brivanlou, A.H. and Darnell, J.E. (2002) Transcription - Signal transduction and the control of gene expression, *Science*, **295**, 813-818.
- Cornish-Bowden, A. (1985) Nomenclature for incompletely specified bases in nucleic acid sequences: recommendations 1984, *Nucleic Acids Res*, **13**, 3021-3030.
- Mitchell, P.J. and Tjian, R. (1989) Transcriptional Regulation in Mammalian-Cells by Sequence-Specific DNA-Binding Proteins, *Science*, **245**, 371-378.
- Thomas, M.C. and Chiang, C.M. (2006) The general transcription machinery and general cofactors, *Critical Reviews in Biochemistry and Molecular Biology*, **41**, 105-178.
- Pajor, A.M. (1999) Sodium-coupled transporters for Krebs cycle intermediates, *Annual Review of Physiology*, **61**, 663-682.
- Palacin, M., *et al.* (1998) Molecular biology of mammalian plasma membrane amino acid transporters, *Physiological Reviews*, **78**, 969-1054.
- Pawson, T. and Scott, J.D. (1997) Signaling through scaffold, anchoring, and adaptor proteins, *Science*, **278**, 2075-2080.
- Shannon, P., *et al.* (2003) Cytoscape: a software environment for integrated models of biomolecular interaction networks, *Genome Res*, **13**, 2498-2504.
- Xu, L., *et al.* (1999) Coactivator and corepressor complexes in nuclear receptor function, *Current Opinion in Genetics & Development*, **9**, 140-147.

## PDF export:

Presently this feature can be accessed at <http://biome.sdsc.edu:8004/molecule>.

|                               |                                                                                                                                                                                                                                                                                                                                                             |
|-------------------------------|-------------------------------------------------------------------------------------------------------------------------------------------------------------------------------------------------------------------------------------------------------------------------------------------------------------------------------------------------------------|
| <b>Molecule Page ID</b>       | A001997                                                                                                                                                                                                                                                                                                                                                     |
| <b>Primary Name</b>           | Rab8a                                                                                                                                                                                                                                                                                                                                                       |
| <b>All Names</b>              | Cell line NK14 derived transforming oncogene; Drab8; Mel; Mel transforming oncogene; Mel transforming oncogene (derived from cell line NK14); Mel transforming oncogene (RAB8 homolog); Oncogene c-mel; Rab protein 8; Rab-protein 8; Rab8; RAB8 homolog; Rab8a; RAB8A, member RAS oncogene family; Ras-associated protein RAB8; Ras-related protein Rab-8A |
| <b>Functional Category</b>    | G protein, Rab                                                                                                                                                                                                                                                                                                                                              |
| <b>Primary Symbol</b>         | Rab8a                                                                                                                                                                                                                                                                                                                                                       |
| <b>Molecule Page Version</b>  | Version 1.0, Peer Reviewed And Published 24 Apr 2008                                                                                                                                                                                                                                                                                                        |
| <b>Corresponding Author</b>   | Angela Wandinger-Ness <a href="mailto:wness@unm.edu">wness@unm.edu</a>                                                                                                                                                                                                                                                                                      |
| <b>Authors</b>                | Angela Wandinger-Ness, Dusanka Deretic                                                                                                                                                                                                                                                                                                                      |
| <b>Editorial Board Member</b> | Maurine E Linder <a href="mailto:mel237@cornell.edu">mel237@cornell.edu</a>                                                                                                                                                                                                                                                                                 |
| <b>Acknowledgments</b>        | The authors gratefully acknowledge grant support from the NIH (R01EY012421) to DD and (NIH R01DK50141 and R03MH081231, as well as NSF MCB0446179) to AWN. Opinions, findings, and conclusions are those of the author(s) and not necessarily the views of the National Science Foundation.                                                                  |
| <b>Accession</b>              | <a href="#">NP_075615.2</a>                                                                                                                                                                                                                                                                                                                                 |
| <b>Entez Gene ID</b>          | <a href="#">17274</a>                                                                                                                                                                                                                                                                                                                                       |
| <b>Species</b>                | Mouse                                                                                                                                                                                                                                                                                                                                                       |
| <b>Sequence</b>               | 1 MAKTYDYLFK LLLIGDSGVG KTCVLFRFSE DAFNSTFIST IGIDFKIRTI<br>51 ELDGKRIKLQ IWDTAGQERF RTITTAYYRG AMGIMLVYDI TNEKSFDNIR<br>101 NWIRNIEEHA SADVEKMILG NKCDVNDKRQ VSKERGEKLA LDYGIKFMET<br>151 SAKANINVEN AFFTLARDIK AKMDKKLEGN SPQGSSHGVK ITVEQQKRTS<br>201 FFRCSLL                                                                                            |
| <b>Sequence Length</b>        | 207 aa                                                                                                                                                                                                                                                                                                                                                      |
| <b>Molecular Weight</b>       | 23.669699 kD                                                                                                                                                                                                                                                                                                                                                |
| <b>Isoelectric Point</b>      | pH 9.15                                                                                                                                                                                                                                                                                                                                                     |
| <b>Extinction Coefficient</b> | 19420 M <sup>-1</sup> cm <sup>-1</sup>                                                                                                                                                                                                                                                                                                                      |
| <b>Absorption Coefficient</b> | 0.82                                                                                                                                                                                                                                                                                                                                                        |
| <b>Aliphatic Index</b>        | 82.95                                                                                                                                                                                                                                                                                                                                                       |

## Rab8a

Angela Wandinger-Ness<sup>1</sup> and Dusanka Deretic<sup>2</sup>

**The Rab8a GTPase is one of two known protein isoforms that have cell-type specific functions during the process of exocytosis and coordinates regulation of the cytoskeleton. Rab8a also appears to interface with endocytic recycling circuits. At the molecular level, Rab8a regulates both the export of vesicles from the trans-Golgi apparatus, and the directed translocation along actin filaments and microtubules. Rab8a also regulates targeted fusion with select plasma membrane domains; including the apical membrane of enterocytes and kidney proximal tubule cells, basolateral membrane of Madin-Darby canine kidney (MDCK) cells, neuronal dendrites and the primary cilium. Numerous regulators of Rab8a activity, such as Rab8a specific guanine exchange factors (GEFs), GTPase-activating proteins (GAPs) and kinases have been shown to modulate activity, while cytoskeletal motors or motor-binding proteins and effectors help coordinate Rab8a function during membrane trafficking. Rab8a has critical roles in the processes of cell morphogenesis, cell signaling and development. Consequently, Rab8a functional deficiencies result in retinal degeneration, microvillar atrophy and an inability to absorb nutrients, as well as developmental and kidney disorders.**

### PROTEIN FUNCTION

The revolutionary identification of two Ras-like GTPases, Sec4p and Ypt1p, with crucial regulatory functions in *Saccharomyces cerevisiae* secretion rapidly led to the discovery of additional small molecular GTPases in mammalian cells and fission yeast (Salminen and Novick 1987; Segev *et al.* 1988; Zahraoui *et al.* 1989; Haubruck *et al.* 1990). Seven mammalian Rab GTPases were identified in the first cohort and all were shown to be involved in exocytosis (Zahraoui *et al.* 1989). Rab8 was identified soon thereafter as a regulator of membrane trafficking from the trans-Golgi apparatus to the basolateral epithelial plasma membrane or the dendritic plasma membrane of cultured neurons and as a close functional and sequence homolog of Ypt2 in *Schizosaccharomyces pombe* and Sec4 in *S. cerevisiae* (Salminen and Novick 1987; Haubruck *et al.* 1990; Huber *et al.* 1993a; Huber *et al.* 1993b).

Overall, in specialized cell types, Rab8a regulates the polarized trafficking of diverse cargo and serves as an essential interface between membrane transport circuits, the cytoskeleton and cell signaling. After its initial characterization, Rab8 was shown to be mandatory for neurite outgrowth and for the export of exocytic vesicles carrying rhodopsin from the trans-Golgi network to the rod outer segment of photoreceptor cells (Deretic *et al.* 1995; Huber *et al.* 1995). In melanocytes and neurons, Rab8 regulates melanosome trafficking, beta-amyloid precursor protein processing and secretion, and trafficking of AMPA ( $\alpha$ -amino-3-hydroxy-5-methyl-4-isoxazole propionic acid) receptor (McConlogue *et al.* 1996; Chakraborty *et al.* 2003; Gerges *et al.* 2004; Chabrilat *et al.* 2005).

In intestinal epithelia, Rab8a is essential for localization of apical proteins and maintenance of intestinal microvilli (Sato *et al.* 2007). The formation of membrane protrusions through extensive rearrangements of both actin-based and microtubule-based networks was first revealed upon overexpression of wild-type Rab8 or a constitutively active Rab8Q67L mutant, thereby linking Rab8-regulated trafficking and cytoskeletal rearrangements (Peränen *et al.* 1996; Kobayashi 2002). On the other hand, the inactivating Rab8T22N mutant expressed in transgenic *Xenopus laevis* inhibited docking and fusion of rhodopsin-containing export vesicles and caused dramatic retinal degeneration (Moritz *et al.* 2001). Like other Rab GTPases, Rab8a synchronizes multiple events in transport from budding to fusion. In the Golgi apparatus, Rab8a interfaces with the clathrin adapter protein-1B (AP-1B), the optineurin effector and motor protein myosin VI to promote cargo export, possibly through recycling endosomes (Ang *et al.* 2003; Ang *et al.* 2004; Sahlender *et al.* 2005; Au *et al.* 2007). Interaction of Rab8a with the Sec6/8 exocyst components is thought to control vesicle docking and fusion with the basolateral plasma membrane (Ang *et al.* 2004).

The unique capacity of Rab8a to nucleate cytoskeletal-based protrusions and regulate transport is in keeping with its recently identified role in ciliogenesis (Nachury *et al.* 2007; Yoshimura *et al.* 2007). The primary cilium is present on nearly all mammalian cells and the rod outer segment of photoreceptors is considered a modified cilium. Primary cilia are critical for organogenesis, cell signaling and differentiation, thus placing Rab8 centrally in these processes. Further roles for Rab8a in

<sup>1</sup>Pathology, University of New Mexico, MSC08 4640, Albuquerque, NM 87131, US

<sup>2</sup>Ophthalmology and Cell Biology & Physiology, University of New Mexico, 915 Camino de Salud, NE, Albuquerque, NM 87131, US  
Correspondence should be addressed to Angela Wandinger-Ness (wness@unm.edu)

controlling macropinosome formation, nuclear shuttling and regulation of apoptosis, and endocytic recycling and endosomal cholesterol removal have also been demonstrated (De Marco *et al.* 2006; Hattula *et al.* 2006; Roland *et al.* 2007; Linder *et al.* 2007).

A second Rab8 isoform with distinct tissue distribution, but with functional commonalities in its regulation of cytoskeletal rearrangements and neurite outgrowth was identified and termed Rab8b (Armstrong *et al.* 1996). Because Rab8a activity is crucial for controlling exocytic and endocytic transport, cytoskeletal rearrangements and cell morphology, it is not surprising that in the absence of proper regulation, a number of human diseases result, such as open angle glaucoma, human microvillus inclusion disease and Bardet Biedl Syndrome (Rezaie *et al.* 2002; De Marco *et al.* 2006; Sato *et al.* 2007; Nachury *et al.* 2007).

### REGULATION OF ACTIVITY

Rab8a, like other Rab family members, is regulated through a cycle of nucleotide binding and hydrolysis, as well as membrane binding and release (Schwartz *et al.* 2007). Membrane binding is partly regulated by post-translational modification at the C terminus, via an isoprenoid moiety. Rab8a has a CaaX motif that is modified by geranylgeranyl transferase (Joberty *et al.* 1993; Wilson *et al.* 1998). After prenylation, the tripeptide-AAX motif is cleaved and the terminal cysteine is methylated (Leung *et al.* 2007).

Nucleotide binding is regulated by specific guanine nucleotide GEFs. MSS4 (accession number CAA49904) was the first nucleotide exchange factor shown to act on Rab8 as well as several other Rab GTPases (Burton *et al.* 1994). Subsequently, a Rab8a specific nucleotide exchange factor, human Rabin8 (equivalent to rat Rabin3; accession number AAA67890.1), was identified via a yeast two-hybrid assay and shown to act only on Rab8 and not on Rab3 (Hattula *et al.* 2002). Rabin8 expression resulted in cytoskeletal remodelling and enhanced Golgi to plasma membrane transport, which is analogous to activated Rab8a, further demonstrating the importance of Rabin8 in Rab8a activation. The growing number of human diseases resulting from a defect in this regulation also supports the pivotal role of Rabin8 in the regulation of Rab8a activity (discussed further under Rab8a function).

Nucleotide hydrolysis and Rab inactivation is modulated by GAPs. AS160 (also called TBC1 domain family, member 4 (Tbc1d4); accession number NP\_001074747.2) was shown to function as a Rab8a and Rab14 GAP in L6 muscle cells (Ishikura *et al.* 2007). In addition, the Rab8a specific GAP Tbc1d30 (also called XM\_037557; accession number BAA76828.1) was identified by screening for GAP activities that were inhibitory in primary cilia formation (Yoshimura *et al.* 2007), mirroring data showing Rab8a activity was required in the process (Nachury *et al.* 2007). Although several regulators of Rab8a activation status are now known, it remains of interest if Rab8a activity is locally regulated, for example, at the lateral membrane or at cilia by distinct sets of regulators.

Rab proteins may be regulated by serine, threonine or tyrosine phosphorylation. In platelets stimulated with thrombin, phosphorylation of Rab8 is reported to enhance alpha granule secretion

(Karniguian *et al.* 1993), though the site of phosphorylation and the kinase responsible have not been identified.

### INTERACTIONS WITH LIGANDS AND OTHER PROTEINS

Rab GTPases are in part spatially and temporally regulated by nucleotide (ligand) binding and hydrolysis, which is, in turn, controlled by multiple accessory proteins (see also Rab8a Regulation of Activity section). In the regulation of ciliogenesis, the Rab8a GEF, rabin8, is anchored to a large protein complex called the BBSome at the basal body. Here the BBSome specifically recruits and activates GTP binding by Rab8a and promotes extension of the ciliary membrane (Nachury *et al.* 2007). Ciliogenesis is further controlled by the Rab8a effector cenexin 3/ODF2 (accession number NP\_038643.1) and a Rab8a specific GAP, XM\_037557, that promotes hydrolysis of bound nucleotide to GDP (Yoshimura *et al.* 2007).

The sequential interaction with multiple effector (proteins binding active Rab8a) and interacting proteins provides further spatial and temporal control over Rab8a regulated membrane transport. The stress-activated serine/threonine protein kinase, the germinal center (GC) kinase, was the first Rab8 interacting protein to be identified, but has not received much follow-up (Ren *et al.* 1996). Most interesting in the context of Rab8a function are the connections to both actin and microtubule networks. FIP-2 (14.7 kD interacting protein) was originally identified as a tumor necrosis factor (TNF)- $\alpha$ -inducible coiled-coil protein that interacts with adenovirus protein E3 14.7 kD protein (Li *et al.* 1998; Hattular and Peranen 2000.) FIP-2 (also known as optineurin) (accession number Q96CV9) is a Rab8a effector that links membranes bound to Rab8a to the actin cytoskeleton through myosin VI, a minus-end directed motor (Hattula and Peränen 2000; Sahlender *et al.* 2005). Optineurin interaction with huntingtin (Hdh, Htt or HIP1) links the complex to microtubules via HAP1 (a trio-like protein with a Rac1 GEF domain), dynactin (p150glued) and dynein (Wanker *et al.* 1997; Engelender *et al.* 1997; Sahlender *et al.* 2005). Upon oxidative stress, optineurin dissociates from Rab8a and translocates into the nucleus to prevent apoptosis (De Marco *et al.* 2006). An E50K optineurin mutant associated with glaucoma fails to translocate into the nucleus.

Several synaptotagmin-like proteins, including Slp1/JFC1 (accession number BAB32651), Slp4/granuphilin (accession number AAH26819.1), Noc2 (accession number BAD07030.1), rabphilin (accession number BAD07029.1) and Rim2 (accession number BAD32694.1) have also been shown to interact with Rab8a (Fukuda 2003; Hattula *et al.* 2006) and are of interest because these proteins are likely to function in linking Rab8 to plus end directed myosin motors.

Noc2 preferentially binds Rab27A/B *in vivo*, but also interacts strongly with Rab8a and all isoforms of Rab3A/B/C/D. Noc2 does not interact with Rab8b. Rabphilin, by comparison, interacts almost equally with Rab27A/B and Rab8a. Both Noc2 and rabphilin bind selectively to the dominant active Rab8a, as compared to the dominant inactive Rab8a protein, suggesting that they may behave as Rab8a effector proteins. Tissue and cellular immunolocalization

studies show Noc2 to be highly expressed in amine and peptide secreting endocrine cells where it is associated with secretory granules (Teramae *et al.* 2007). A Noc2 null mouse accumulates secretory granules in exocrine and endocrine cells (Matsumoto *et al.* 2004). At present, it is difficult to judge the extent of Rab8a and Noc2 expression in similar cell types, though it is noteworthy that Noc2 was cloned from a mouse adult brain library and both proteins are expressed in the small intestine (Fukuda 2003; Matsumoto *et al.* 2004; Sato *et al.* 2007). Rab8a has been shown to be most highly expressed in lung, liver, skeletal muscle, kidney and testis, but specific expression and function in endocrine and exocrine cells has not been analyzed (Armstrong *et al.* 1996). Conversely, the expression of Noc2 in tissues with highest Rab8a expression or in cells with known requirements for Rab8a function has not been studied. Rabphilin was originally identified as a Rab3 specific effector protein (Shirataki *et al.* 1993). However, studies in rabphilin knock-out mice and *C. elegans* did not reveal a requirement for Rab3A and rabphilin interaction in neurotransmitter release, though rabphilin did interact with syntaxin, SNAP25 and SNARE proteins to regulate neurotransmitter release (Schlüter *et al.* 1999; Staunton *et al.* 2001). Careful reassessment by Fukuda in 2003 using co-immunoprecipitation assays showed that rabphilin binds strongly to Rab27A and Rab8A, modestly to Rab3A/B/C/D, marginally to Rab15 and failed to bind any of the other 38 recombinant Rab proteins tested, including Rab8B. The Rab switch I region is crucial for rabphilin binding, although two  $\alpha$ -helical Slp homology domains in rabphilin function in Rab binding (SHD1/RBD1 and SHD2/RBD2). Both Noc2 and rabphilin bind selectively to the dominant active Rab8A, as compared to the dominant inactive Rab8A protein, suggesting that they may behave as Rab8A effector proteins. Functional and localization studies on rabphilin suggest that it is required during regulated secretion and expression in neuronal, neuroendocrine, intestinal goblet cells and kidney podocytes (Shirataki *et al.* 1993; Stahl *et al.* 1996; Rastaldi *et al.* 2003; Valentijn *et al.* 2007). At the subcellular level, rabphilin is associated with the cis-Golgi and the actin cytoskeleton (Baldini *et al.* 2005; Valentijn *et al.* 2007). Because most studies, including those cited here, have examined rabphilin expression only in the context of co-expression and complex formation with Rab3A, the *in vivo* function of a rabphilin/Rab8A complex remains enigmatic. Thus, analyses of the *in vivo* functions of rabphilin are of significant interest for further study. The kidney, particularly the podocytes, might represent a good starting point, as both Rab8 and rabphilin are known to be expressed in kidney podocytes (Simons *et al.* 1999).

Rim2 interacts with Rab8a and Rab3A/B/C/D (Fukuda 2003). Multiple isoforms of the Rim1 and Rim2 proteins appear to arise by alternate RNA splicing (Fukuda 2003; Fukuda 2005). Rim2 has a Rab binding domain 1 (RBD1) highly homologous to Rim1 lacking amino acids 56–105. A conserved acidic cluster (KKEEK) in Rim2 and Rim1 $\Delta$ 56-105 is critical for distinguishing Rab3A and Rab27A binding. However, Rim2 and Rim1 $\Delta$ 56-105 exhibit all binding activities for Rab8A and none for Rab26, respectively, suggesting that additional unidentified sequences in Rim2 are required for Rab8A recognition. As is the case for

Rabphilin, the Rab switch I domain is critical for Rim2 to recognize Rab. Rim2 function has been primarily studied in regulated secretion in endocrine and exocrine cell types (Shibasaki *et al.* 2004; Fukuda 2005). Further study, therefore, is required to elucidate whether or not Rab8a and Rim2 are co-expressed in similar cell types and have any functional interdependence.

Rab8a-GTP interacts directly with the synaptotagmin-like protein 1/exophilin 7, designated Slp1 or Sytl1 (mouse) or JFC1 (human), to promote membrane protrusions (Hattula *et al.* 2006). There is also a functional interaction between Rab8a and Arf6 in the formation of protrusions (Hattula *et al.* 2006). Slp1 interacts with Akt, Rab27a and the nicotinamide adenine dinucleotide phosphate (NADPH) oxidase and is proposed to serve as an adapter to regulate vesicle secretion or NADPH oxidase activity in response to stimulus and protein kinase  $\beta$  (AKT) or phosphatidylinositol-3-OH kinase activation (McAdara Berkowitz *et al.* 2001; Johnson *et al.* 2005). Synaptotagmin-like protein 4 a (Slp4a)/granuphilin-a is present on insulin containing vesicles of pancreatic  $\beta$  cells, as well as on dense core vesicles of neuroendocrine cells (Fukuda *et al.* 2002). On dense core vesicles, Slp4a specifically forms complexes with Rab27A and a minor fraction of Rab8A; the major fraction of Rab8A being present in a Slp4a-free state in the cell body. The Slp4a/Rab27A complex serves to negatively regulate neuropeptide secretion, due to the specific interaction of Slp4a with Rab27A in its GDP bound form (Fukuda 2003). The Slp4a/Rab8a complex had no apparent function in regulated secretion (Fukuda *et al.* 2002); thus, the function of Slp4a as a Rab8a negative regulator or effector remains in question. Rabphilin, Noc2 and Rim2 are more likely candidates for being Rab8A effectors (Fukuda 2003). Careful analyses of the localization of various Slp protein family members with respect to Rab8a, as well as their *in vivo* functions as Rab8A effectors will be required.

On the endocytic recycling circuit, Rab8a is involved in non-clathrin mediated endocytosis, where interactions with either myosin Vb or Vc may regulate distinct routes (Roland *et al.* 2007).

These interactions are presented in tabular format in Table 1 and in graphical format in Figure 1.

#### REGULATION OF CONCENTRATION

There is limited information on the regulation of Rab8a protein concentration. The levels of Rab8 are reported to decrease in Alzheimer's disease or upon expression of mutant presenillin (Shimohama *et al.* 1999; Kametani *et al.* 2004). In the small intestine, Rab8a was most highly expressed in 2-week-old mice, but its expression decreased afterwards (Sato *et al.* 2007). Rab8a levels were also decreased in human microvillus inclusion disease. Conversely, levels of Rab8a and several other exocytic Rab GTPases are increased during egg development (Bruscalupi *et al.* 1998). The mechanisms regulating increases or decreases in Rab8a protein levels remain undefined.

#### SUBCELLULAR LOCALIZATION

Rab8a has multiple subcellular localizations depending on its activation status and cellular function. Like most Rab GTPases, inactive protein is found in the cytoplasm in a complex with GDP dissociation inhibitor



**Table 1 | Functional States of Rab8a**

| Description             | Components                                                                 | Location                     |
|-------------------------|----------------------------------------------------------------------------|------------------------------|
| Rab8a                   | Rab8a                                                                      | Unknown                      |
| Rab8a-GDP               | Rab8a GDP                                                                  | cytoplasm                    |
| Rab8a-GDP/Rep1          | Rab8a GDP, Chm                                                             | cytoplasm                    |
| Rab8a-GDP-GG/Rep1       | Rab8a GG GDP, Chm                                                          | cytoplasm                    |
| Rab8a-GDP-GG/Rep1       | Rab8a GG GDP, Chm                                                          | endoplasmic reticulum        |
| Rab8a-GDP-GG (ER)       | Rab8a GG GDP                                                               | endoplasmic reticulum        |
| Rab8a-GDP-GG-PR         | Rab8a GG PR GDP                                                            | endoplasmic reticulum        |
| Rab8a-GDP-GG-PR-Me      | Rab8a GG ME PR GDP                                                         | endoplasmic reticulum        |
| Rab8a-GDP (mem)         | Rab8a GG ME PR GDP                                                         | membrane                     |
| Rab8a-GDP/Rabin3        | Rab8a GG ME PR GDP, Rab3ip                                                 | cilium membrane              |
| Rab8a-GTP/Rabin3        | Rab8a GG ME PR GTP, Rab3ip                                                 | cilium membrane              |
| Rab8a-GDP/Rabin3/Actin  | Rab8a GG ME PR GDP, Rab3ip                                                 | cortical actin cytoskeleton  |
| Rab8a-GDP/Rabin3/BBSome | Rab8a GG ME PR GDP, Rab3ip, Bbs1, Bbs9, Bbs4, Ttc8, Bbs7, Bbs2, Bbs5, Pcm1 | basal body                   |
| Rab8a-GTP/Rabin3/BBSome | Rab8a GG ME PR GTP, Rab3ip, Bbs1, Bbs9, Bbs4, Ttc8, Bbs7, Bbs2, Bbs5, Pcm1 | basal body                   |
| Rab8a-GDP/Mss4          | Rab8a GG ME PR GDP, Rabif                                                  | membrane                     |
| Rab8a-GTP/Mss4          | Rab8a GG ME PR GTP, Rabif                                                  | membrane                     |
| Rab8a-GTP               | Rab8a GG ME PR GTP                                                         | membrane                     |
| Rab8a-GTP (Golgi)       | Rab8a GG ME PR GTP                                                         | Golgi apparatus              |
| Rab8a-GTP (TGN)         | Rab8a GG ME PR GTP                                                         | trans-Golgi network membrane |
| Rab8a-GTP (mel)         | Rab8a GG ME PR GTP                                                         | melanosome membrane          |
| Rab8a-GTP/Optineurin    | Actb, Hap1, Myo6, Dynll1, Rab8a GG ME PR GTP, Htt, Dctn1, Optn             | trans-Golgi network membrane |
| Rab8a-GTP/Optineurin    | Ap1b1, Ap1g1, Ap1m2, Ap1s1, Myo6, Rab8a GG ME PR GTP, Optn                 | endosome                     |
| Rab8a-GTP (endo)        | Rab8a GG ME PR GTP                                                         | endosome                     |
| Rab8a-GTP/Myo5b         | Rab8a GG ME PR GTP, Myo5b, Ehd1, Ehd3                                      | endosome                     |
| Rab8a-GTP (sec ves)     | Rab8a GG ME PR GTP                                                         | secretory vesicle membrane   |
| Rab8a-GTP/Noc2          | Rab8a GG ME PR GTP, Rph3a1                                                 | secretory vesicle membrane   |
| Rab8a-GTP/Rabphilin     | Rab8a GG ME PR GTP, Rph3a                                                  | secretory vesicle membrane   |
| Rab8a-GTP/Rim2          | Rab8a GG ME PR GTP, Rims2                                                  | secretory vesicle membrane   |
| Rab8a-GTP (baso PM)     | Rab8a GG ME PR GTP                                                         | basolateral plasma membrane  |
| Rab8a-GTP (ciliary mem) | Rab8a GG ME PR GTP                                                         | cilium membrane              |
| Rab8a-GTP/Tbc1d30       | Rab8a GG ME PR GTP, TBC1D30                                                | cilium membrane              |
| Rab8a-GDP/Tbc1d30       | Rab8a GG ME PR GDP, TBC1D30                                                | cilium membrane              |
| Rab8a-GTP-P             | Rab8a GG ME P PR GTP                                                       | platelet alpha granule       |
| Rab8a-GTP/Tbc1d4        | Rab8a GG ME PR GTP, Tbc1d4                                                 | membrane                     |
| Rab8a-GDP/Tbc1d4        | Rab8a GG ME PR GDP, Tbc1d4                                                 | membrane                     |
| Rab8a-GTP/ODF2          | Rab8a GG ME PR GTP, Odf2                                                   | membrane                     |
| Rab8a-GTP/Gck           | Map4k2, Rab8a GG ME PR GTP                                                 | membrane                     |
| Rab8a-GTP/Slp1          | Rab8a GG ME PR GTP, Syt11                                                  | membrane                     |
| Rab8a-GTP/Slp4a         | Rab8a GG ME PR GTP, Syt14                                                  | membrane                     |
| Rab8a-GDP/GDI1          | Rab8a GG ME PR GDP, Gdi1                                                   | cytoplasm                    |
| Rab8a-GTP/Myo5c         | Myo5c, Rab8a GG ME PR GTP                                                  | membrane                     |

GG, geranylgeranyl; ME, methyl; PR, proteolysis; GTP, Guanosine-5'-triphosphate; GDP, Guanosine-5'-diphosphate

(GDI; accession number P21856). Isoprenylation by protein geranylgeranyltransferase enzymes facilitates membrane association.

Prenylation by GGTaseI represents the minor pathway of Rab8a geranylgeranylation (Wilson *et al.* 1998). The nucleotide status of Rab8a that permits its interaction with GGTaseI has not been rigorously tested, but is suggested to be rab8a-GDP, based on the requirements for rab protein binding to the related proteins, REP1 and Rab GDI.

The majority of Rab8a (60–70%) is geranylgeranylated by the REP1/GGTaseII system *in vivo* (Wilson *et al.* 1998). Rab proteins form a ternary complex with REP1/GGTaseII via two possible routes (Goody *et al.* 2005). The first such route involves the rab protein first binding to REP1; this binary complex then associates with GGTaseII bound to geranylgeranyl pyrophosphate. REP1 also exhibits significant affinity for GGTaseII bound to geranylgeranyl pyrophosphate, so a second possible pathway could involve the REP1/GGTaseII-GGpp complex subsequently recruiting the rab protein. After geranylgeranylation, the GGTase dissociates and REP1 delivers the modified protein to the membrane via a

classical pathway (Alexandrov *et al.* 1994). GGTaseII does not have any detectable affinity for rab proteins in the absence of REP1, suggesting that a binary complex between GGTaseII and rab does not exist (Pereira-Leal *et al.* 2003; Goody *et al.* 2005). Mutation of the  $\alpha$ -subunit of GGTaseII results in pigmentation and immune defects in mice (Detter *et al.* 2000) and may serve as a regulatory subunit (Zhang *et al.* 2000). The beta subunit of GGTaseII binds to geranylgeranyl pyrophosphate and serves as the catalytic subunit (Zhang *et al.* 2000). Following prenylation, Rab8a is initially delivered to the endoplasmic reticulum membrane, where it undergoes proteolytic processing and carboxymethylation before being rerouted to its site of function (Leung *et al.* 2007).

Rab8a is found to be associated with the actin cytoskeleton, BBSomes, the basolateral or dendritic plasma membrane, the trans-Golgi network, recycling endosomes, melanosomes and the primary cilium membrane (Huber *et al.* 1993a; Huber *et al.* 1993b; Deretic *et al.* 1995; Peränen *et al.* 1996; Gomez *et al.* 2001; Chakraborty 2003; Ang *et al.* 2004; Chabrilat *et al.* 2005; Hattula *et al.* 2006; Nachury *et al.* 2007; Roland *et al.* 2007; Sato *et al.* 2007; Yoshimura *et al.*

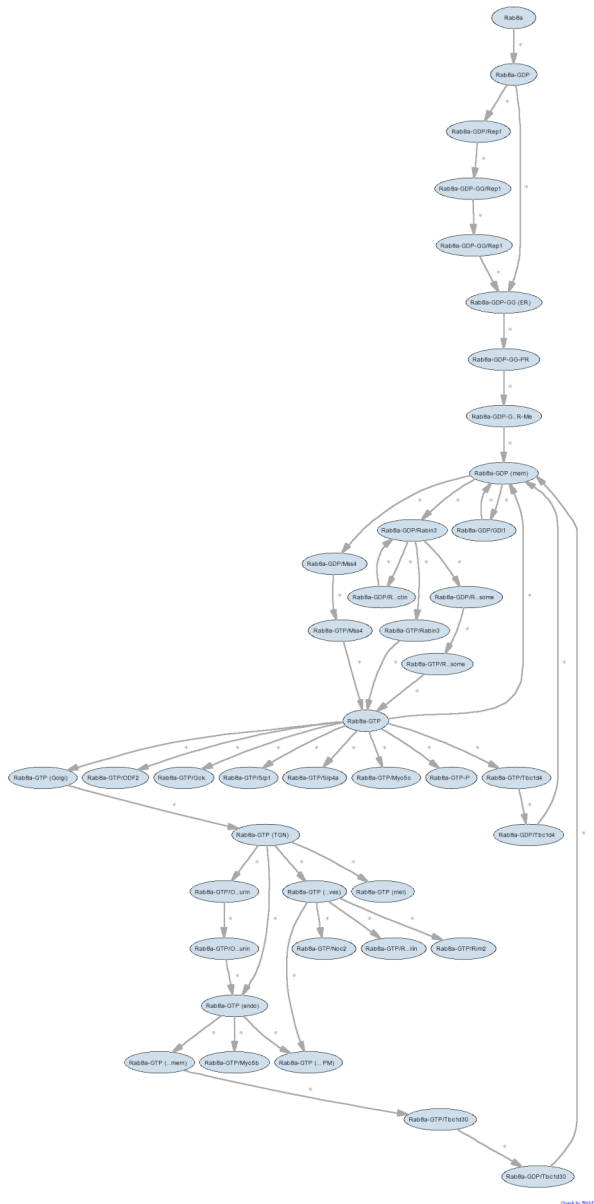

**Figure 1 |** Functional states of Rab8a (blue ovals). Arrows depict transitions between the different functional states.

2007). Mislocalization of Rab8a has been reported in autosomal dominant polycystic kidney disease (Charron *et al.* 2000).

#### MAJOR SITES OF EXPRESSION

Rab8a is encoded on human chromosome 19. At the messenger RNA (mRNA) level Rab8a is significantly expressed in lung, liver, skeletal muscle, kidney and testis, but only negligibly expressed in heart, brain and spleen (Elferink *et al.* 1992; Armstrong *et al.* 1996). mRNA expression corresponds in a large part to the reported protein expression, which is highly expressed in brain, small intestine, kidney, spleen and thymus, moderately expressed in heart, lung, liver, and pancreas, and scarcely expressed in skeletal muscles

(Sato *et al.* 2007). At the cellular level, Rab8a protein is expressed in numerous cell types, including kidney epithelia and podocytes (Chavrier *et al.* 1990; Charron *et al.* 2000; Kobayashi 2002), photoreceptor cells (Deretic *et al.* 1995), neurons and brain (Elferink *et al.* 1992; Ghorbel *et al.* 2005), adipocytes (Cormont *et al.* 1993), platelets (Karniguian *et al.* 1993) and melanocytes (Chakraborty *et al.* 2003). The tissue expression of Rab8a is in keeping with its specific functions in polarized membrane trafficking and process formation in neurons and cilia formation in the epithelia.

#### PHENOTYPES

No naturally occurring mutations or deletions of Rab8a or phenotypes have been reported in humans, mice, or other organisms, although reduced expression and impaired activation may occur in neurological disease, intestinal and kidney disease (Kametani *et al.* 2004; Sato *et al.* 2007; Nachury *et al.* 2007). Overexpression of mutant presenilin (A260V) in PC12 cells reduced Rab8 expression (Kametani *et al.* 2004), however, in a transgenic mouse model of familial Parkinson's disease (Tg5093 mice), Rab8a exhibits enhanced binding to the mutant human A30P alpha-synuclein (Dalfó *et al.* 2004).

Loss of Barbet-Biedl Syndrome protein 1 prevented Rab8a activation and is an underlying cause of a pleiotropic developmental disorder that causes polydactyly, obesity, cystic kidneys, retinopathy, intestinal fibrosis among other deficits (Nachury *et al.* 2007). In this regard it is interesting to consider the phenotypes of transgenic and null animals. A conditional knockout mouse lacking Rab8a expression in the intestine resulted in the redirection of apical peptidases and transporters to lysosomes and a significant impairment in nutrient absorption that led to premature death showing the importance of Rab8a in the intestine (Sato *et al.* 2007). A transgenic *X. laevis* that expressed the dominant negative Rab8T22N mutant resulted in rapid retinal degeneration, demonstrating the critical function of Rab8a in retinal photoreceptor cells (Moritz *et al.* 2001). The combined data show that loss of Rab8a activation or loss of Rab8a may be functionally equivalent.

#### SPICE VARIANTS

There are no known splice variants for Rab8a. The related Rab8b homologue is encoded by a separate gene on human chromosome 15 (Armstrong *et al.* 1996).

#### ANTIBODIES

Monoclonal anti-Rab8 is available from BD-Biosciences (610844) and, in the authors' experience, works extremely well for immunofluorescence and immunoblotting methods. This mouse IgG2b was generated using amino acids 84–205 of human Rab8. There is significant sequence similarity between Rab8a and Rab8b in this region, with the greatest divergence occurring between amino acids 166–200 in Rab8b. There are Rab8a (anti-MEL) specific antibodies commercially available; however, the authors do not have any experience with these reagents to report.

Published online at <http://www.signaling-gateway.org/molecule/query?afcsid=A001997&type=abstract>

Reprints and permissions information is available at <http://npg.nature.com/reprintsandpermissions>

- Alexandrov, K., Horiuchi, H., Steele-Mortimer, O., Seabra, M. C. & Zerial, M. Rab escort protein-1 is a multifunctional protein that accompanies newly prenylated rab proteins to their target membranes. *Embo J* **13**, 5262-5273 (1994).
- Ang, A. L., Folsch, H., Koivisto, U. M., Pypaert, M. & Mellman, I. The Rab8 GTPase selectively regulates AP-1B-dependent basolateral transport in polarized Madin-Darby canine kidney cells. *J Cell Biol* **163**, 339-350 (2003).
- Ang, A. L., Taguchi, T., Francis, S., Folsch, H., Murrells, L. J., Pypaert, M., *et al.* Recycling endosomes can serve as intermediates during transport from the Golgi to the plasma membrane of MDCK cells. *J Cell Biol* **167**, 531-543 (2004).
- Armstrong, J., Thompson, N., Squire, J. H., Smith, J., Hayes, B. & Solari, R. Identification of a novel member of the Rab8 family from the rat basophilic leukaemia cell line, RBL.2H3. *J Cell Sci* **109** ( Pt 6), 1265-1274 (1996).
- Au, J. S., Puri, C., Ihrke, G., Kendrick-Jones, J. & Buss, F. Myosin VI is required for sorting of AP-1B-dependent cargo to the basolateral domain in polarized MDCK cells. *J Cell Biol* **177**, 103-114 (2007).
- Ayala, J., Touchot, N., Zahraoui, A., Tavitian, A. & Prochiantz, A. The product of rab2, a small GTP binding protein, increases neuronal adhesion, and neurite growth in vitro. *Neuron* **4**, 797-805 (1990).
- Baldini, G., Martelli, A. M., Tabellini, G., Horn, C., Machaca, K., Narducci, P., *et al.* Rabphilin localizes with the cell actin cytoskeleton and stimulates association of granules with F-actin cross-linked by {alpha}-actinin. *J Biol Chem* **280**, 34974-34984 (2005).
- Barlow, D., Naghizadeh, F. & King, J. Serum lactate dehydrogenase activity ratios with different substrates. *Clin Biochem* **8**, 307-315 (1975).
- Bruscalupi, G., Cicuzza, S., Allen, C. M., Di Croce, L. & Trentalance, A. Estrogen stimulates intracellular traffic in the liver of *Rana esculenta* complex by modifying Rab protein content. *Biochem Biophys Res Commun* **251**, 301-306 (1998).
- Burton, J. L., Burns, M. E., Gatti, E., Augustine, G. J. & De Camilli, P. Specific interactions of Mss4 with members of the Rab GTPase subfamily. *Embo J* **13**, 5547-5558 (1994).
- Chabrilat, M. L., Wilhelm, C., Wasmeier, C., Sviderskaya, E. V., Louvard, D. & Coudrier, E. Rab8 regulates the actin-based movement of melanosomes. *Mol Biol Cell* **16**, 1640-1650 (2005).
- Chakraborty, A. K., Funasaka, Y., Araki, K., Horikawa, T. & Ichihashi, M. Evidence that the small GTPase Rab8 is involved in melanosome traffic and dendrite extension in B16 melanoma cells. *Cell Tissue Res* **314**, 381-388 (2003).
- Charron, A. J., Bacallao, R. L. & Wandinger-Ness, A. ADPKD: a human disease altering Golgi function and basolateral exocytosis in renal epithelia. *Traffic* **1**, 675-686 (2000).
- Chavrier, P., Vingron, M., Sander, C., Simons, K. & Zerial, M. Molecular cloning of YPT1/SEC4-related cDNAs from an epithelial cell line. *Mol Cell Biol* **10**, 6578-6585 (1990).
- Chung, S. H., Takai, Y. & Holz, R. W. Evidence that the Rab3a-binding protein, rabphilin3a, enhances regulated secretion. Studies in adrenal chromaffin cells. *J Biol Chem* **270**, 16714-16718 (1995).
- Cormont, M., Tanti, J. F., Zahraoui, A., Van Obberghen, E., Tavitian, A. & Le Marchand-Brustel, Y. Insulin and okadaic acid induce Rab4 redistribution in adipocytes. *J Biol Chem* **268**, 19491-19497 (1993).
- Dalfo, E., Gomez-Isla, T., Rosa, J. L., Nieto Bodelon, M., Cuadrado Tejedor, M., Barrachina, M., *et al.* Abnormal alpha-synuclein interactions with Rab proteins in alpha-synuclein A30P transgenic mice. *J Neuropathol Exp Neurol* **63**, 302-313 (2004).
- De Marco, N., Buono, M., Troise, F. & Diez-Roux, G. Optineurin increases cell survival and translocates to the nucleus in a Rab8-dependent manner upon an apoptotic stimulus. *J Biol Chem* **281**, 16147-16156 (2006).
- Deretic, D., Huber, L. A., Ransom, N., Mancini, M., Simons, K. & Papermaster, D. S. rab8 in retinal photoreceptors may participate in rhodopsin transport and in rod outer segment disk morphogenesis. *J Cell Sci* **108** ( Pt 1), 215-224 (1995).
- Detter, J. C., Zhang, Q., Mules, E. H., Novak, E. K., Mishra, V. S., Li, W., *et al.* Rab geranylgeranyl transferase alpha mutation in the gunmetal mouse reduces Rab prenylation and platelet synthesis. *Proc Natl Acad Sci U S A* **97**, 4144-4149 (2000).
- Elferink, L. A., Anzai, K. & Scheller, R. H. rab15, a novel low molecular weight GTP-binding protein specifically expressed in rat brain. *J Biol Chem* **267**, 5768-5775 (1992).
- Engelender, S., Sharp, A. H., Colomer, V., Tokito, M. K., Lanahan, A., Worley, P., *et al.* Huntingtin-associated protein 1 (HAP1) interacts with the p150Glued subunit of dynactin. *Hum Mol Genet* **6**, 2205-2212 (1997).
- Fukuda, M., Kanno, E., Saegusa, C., Ogata, Y. & Kuroda, T. S. Slp4-a/granuphilin-a regulates dense-core vesicle exocytosis in PC12 cells. *J Biol Chem* **277**, 39673-39678 (2002).
- Fukuda, M. Distinct Rab binding specificity of Rim1, Rim2, rabphilin, and Noc2. Identification of a critical determinant of Rab3A/Rab27A recognition by Rim2. *J Biol Chem* **278**, 15373-15380 (2003).
- Fukuda, M. Slp4-a/granuphilin-a inhibits dense-core vesicle exocytosis through interaction with the GDP-bound form of Rab27A in PC12 cells. *J Biol Chem* **278**, 15390-15396 (2003).
- Fukuda, M. Assay and functional interactions of Rim2 with Rab3. *Methods Enzymol* **403**, 457-468 (2005).
- Gerges, N. Z., Backos, D. S. & Esteban, J. A. Local control of AMPA receptor trafficking at the postsynaptic terminal by a small GTPase of the Rab family. *J Biol Chem* **279**, 43870-43878 (2004).
- Ghorbel, M. T., Becker, K. G. & Henley, J. M. Profile of changes in gene expression in cultured hippocampal neurones evoked by the GABAB receptor agonist baclofen. *Physiol Genomics* **22**, 93-98 (2005).
- Gomez, P. F., Luo, D., Hirotsaki, K., Shinoda, K., Yamashita, T., Suzuki, J., *et al.* Identification of rab7 as a melanosome-associated protein involved in the intracellular transport of tyrosinase-related protein 1. *J Invest Dermatol* **117**, 81-90 (2001).
- Hattula, K. & Peranen, J. FIP-2, a coiled-coil protein, links Huntingtin to Rab8 and modulates cellular morphogenesis. *Curr Biol* **10**, 1603-1606 (2000).
- Hattula, K., Furuholm, J., Arffman, A. & Peranen, J. A Rab8-specific GDP/GTP exchange factor is involved in actin remodeling and polarized membrane transport. *Mol Biol Cell* **13**, 3268-3280 (2002).
- Hattula, K., Furuholm, J., Tikkanen, J., Tanhuanpaa, K., Laakkonen, P. & Peranen, J. Characterization of the Rab8-specific membrane traffic route linked to protrusion formation. *J Cell Sci* **119**, 4866-4877 (2006).
- Haubruck, H., Engelke, U., Mertins, P. & Gallwitz, D. Structural and functional analysis of ypt2, an essential ras-related gene in the fission yeast *Schizosaccharomyces pombe* encoding a Sec4 protein homologue. *Embo J* **9**, 1957-1962 (1990).
- Huber, L. A., De Hoop, M. J., Dupree, P., Zerial, M., Simons, K. & Dotti, C. Protein transport to the dendritic plasma membrane of cultured neurons is regulated by rab8p. *J Cell Biol* **123**, 47-55 (1993).
- Huber, L. A., Pimplikar, S., Parton, R. G., Virta, H., Zerial, M. & Simons, K. Rab8, a small GTPase involved in vesicular traffic between the TGN and the basolateral plasma membrane. *J Cell Biol* **123**, 35-45 (1993).
- Huber, L. A., Dupree, P. & Dotti, C. G. A deficiency of the small GTPase rab8 inhibits membrane traffic in developing neurons. *Mol Cell Biol* **15**, 918-924 (1995).
- Ishikura, S., Bilan, P. J. & Klip, A. Rabs 8A and 14 are targets of the insulin-regulated Rab-GAP AS160 regulating GLUT4 traffic in muscle cells. *Biochem Biophys Res Commun* **353**, 1074-1079 (2007).
- Joberty, G., Tavitian, A. & Zahraoui, A. Isoprenylation of Rab proteins possessing a C-terminal CaaX motif. *FEBS Lett* **330**, 323-328 (1993).
- Kametani, F., Usami, M., Tanaka, K., Kume, H. & Mori, H. Mutant presenilin (A260V) affects Rab8 in PC12D cell. *Neurochem Int* **44**, 313-320 (2004).
- Karniguian, A., Zahraoui, A. & Tavitian, A. Identification of small GTP-binding rab proteins in human platelets: thrombin-induced phosphorylation of rab3B, rab6, and rab8 proteins. *Proc Natl Acad Sci U S A* **90**, 7647-7651 (1993).
- Kobayashi, N. Mechanism of the process formation; podocytes vs. neurons. *Microsc Res Tech* **57**, 217-223 (2002).
- Leung, K. F., Baron, R., Ali, B. R., Magee, A. I. & Seabra, M. C. Rab GTPases containing a CAAX motif are processed post-geranylgeranylation by proteolysis and methylation. *J Biol Chem* **282**, 1487-1497 (2007).
- Linder, M. D., Uronen, R. L., Holtta-Vuori, M., Van Der Sluijs, P., Peranen, J. & Ikonen, E. Rab8-dependent recycling promotes endosomal cholesterol removal in normal and sphingolipidosis cells. *Mol Biol Cell* **18**, 47-56 (2007).
- Matsumoto, M., Miki, T., Shibasaki, T., Kawaguchi, M., Shinozaki, H., Nio, J., *et al.* Noc2 is essential in normal regulation of exocytosis in endocrine and exocrine cells. *Proc Natl Acad Sci U S A* **101**, 8313-8318 (2004).
- Mcadara Berkowitz, J. K., Catz, S. D., Johnson, J. L., Ruedi, J. M., Thon, V. & Babior, B. M. JFC1, a novel tandem C2 domain-containing protein associated with the leukocyte NADPH oxidase. *J Biol Chem* **276**, 18855-18862 (2001).
- Mcconlogue, L., Castellano, F., Dewit, C., Schenk, D. & Maltese, W. A. Differential effects of a Rab6 mutant on secretory versus amyloidogenic processing of Alzheimer's beta-amyloid precursor protein. *J Biol Chem* **271**, 1343-1348 (1996).
- Moritz, O. L., Tam, B. M., Hurd, L. L., Peranen, J., Deretic, D. & Papermaster, D. S. Mutant rab8 impairs docking and fusion of rhodopsin-bearing post-Golgi membranes and causes cell death of transgenic *Xenopus* rods. *Mol Biol Cell* **12**, 2341-2351 (2001).
- Nachury, M. V., Loktev, A. V., Zhang, Q., Westlake, C. J., Peranen, J., Merdes, A., *et al.* A core complex of BBS proteins cooperates with the GTPase Rab8 to promote ciliary membrane biogenesis. *Cell* **129**, 1201-1213 (2007).
- Peranen, J., Auvinen, P., Virta, H., Wepf, R. & Simons, K. Rab8 promotes polarized membrane transport through reorganization of actin and microtubules in fibroblasts. *J Cell Biol* **135**, 153-167 (1996).



- Pereira-Leal, J. B., Strom, M., Godfrey, R. F. & Seabra, M. C. Structural determinants of Rab and Rab Escort Protein interaction: Rab family motifs define a conserved binding surface. *Biochem Biophys Res Commun* **301**, 92-97 (2003).
- Rastaldi, M. P., Armelloni, S., Berra, S., Li, M., Pesaresi, M., Poczewski, H., et al. Glomerular podocytes possess the synaptic vesicle molecule Rab3A and its specific effector rabphilin-3a. *Am J Pathol* **163**, 889-899 (2003).
- Ren, M., Zeng, J., De Lemos-Chiarandini, C., Rosenfeld, M., Adesnik, M. & Sabatini, D. D. In its active form, the GTP-binding protein rab8 interacts with a stress-activated protein kinase. *Proc Natl Acad Sci U S A* **93**, 5151-5155 (1996).
- Rezaie, T., Child, A., Hitchings, R., Brice, G., Miller, L., Coca-Prados, M., et al. Adult-onset primary open-angle glaucoma caused by mutations in optineurin. *Science* **295**, 1077-1079 (2002).
- Roland, J. T., Kenworthy, A. K., Peranen, J., Caplan, S. & Goldenring, J. R. Myosin Vb interacts with Rab8a on a tubular network containing EHD1 and EHD3. *Mol Biol Cell* **18**, 2828-2837 (2007).
- Sahlender, D. A., Roberts, R. C., Arden, S. D., Spudich, G., Taylor, M. J., Luzio, J. P., et al. Optineurin links myosin VI to the Golgi complex and is involved in Golgi organization and exocytosis. *J Cell Biol* **169**, 285-295 (2005).
- Salminen, A. & Novick, P. J. A ras-like protein is required for a post-Golgi event in yeast secretion. *Cell* **49**, 527-538 (1987).
- Sato, T., Mushiaki, S., Kato, Y., Sato, K., Sato, M., Takeda, N., et al. The Rab8 GTPase regulates apical protein localization in intestinal cells. *Nature* **448**, 366-369 (2007).
- Schluter, O. M., Schnell, E., Verhage, M., Tzonopoulos, T., Nicoll, R. A., Janz, R., et al. Rabphilin knock-out mice reveal that rabphilin is not required for rab3 function in regulating neurotransmitter release. *J Neurosci* **19**, 5834-5846 (1999).
- Schwartz, S. L., Cao, C., Pylypenko, O., Rak, A. & Wandinger-Ness, A. Rab GTPases at a glance. *J Cell Sci* **120**, 3905-3910 (2007).
- Segev, N., Mulholland, J. & Botstein, D. The yeast GTP-binding YPT1 protein and a mammalian counterpart are associated with the secretion machinery. *Cell* **52**, 915-924 (1988).
- Shibasaki, T., Sunaga, Y., Fujimoto, K., Kashima, Y. & Seino, S. Interaction of ATP sensor, cAMP sensor, Ca<sup>2+</sup> sensor, and voltage-dependent Ca<sup>2+</sup> channel in insulin granule exocytosis. *J Biol Chem* **279**, 7956-7961 (2004).
- Shimohama, S., Kamiya, S., Taniguchi, T., Sumida, Y. & Fujimoto, S. Differential involvement of small G proteins in Alzheimer's disease. *Int J Mol Med* **3**, 597-600 (1999).
- Shirataki, H., Kaibuchi, K., Sakoda, T., Kishida, S., Yamaguchi, T., Wada, K., et al. Rabphilin-3A, a putative target protein for smg p25A/rab3A p25 small GTP-binding protein related to synaptotagmin. *Mol Cell Biol* **13**, 2061-2068 (1993).
- Simons, M., Saffrich, R., Reiser, J. & Mundel, P. Directed membrane transport is involved in process formation in cultured podocytes. *J Am Soc Nephrol* **10**, 1633-1639 (1999).
- Stahl, B., Chou, J. H., Li, C., Sudhof, T. C. & Jahn, R. Rab3 reversibly recruits rabphilin to synaptic vesicles by a mechanism analogous to raf recruitment by ras. *Embo J* **15**, 1799-1809 (1996).
- Staunton, J., Ganetzky, B. & Nonet, M. L. Rabphilin potentiates soluble N-ethylmaleimide sensitive factor attachment protein receptor function independently of rab3. *J Neurosci* **21**, 9255-9264 (2001).
- Teramae, H., Fujimoto, W., Seino, S. & Iwanaga, T. Cellular expression of Noc2, a Rab effector protein, in endocrine and exocrine tissues in the mouse. *Histochem Cell Biol* **127**, 1-11 (2007).
- Valentijn, J. A., Van Weeren, L., Ultee, A. & Koster, A. J. Novel localization of Rab3D in rat intestinal goblet cells and Brunner's gland acinar cells suggests a role in early Golgi trafficking. *Am J Physiol Gastrointest Liver Physiol* **293**, G165-177 (2007).
- Wanker, E. E., Rovira, C., Scherzinger, E., Hasenbank, R., Walter, S., Tait, D., et al. HIP-I: a huntingtin interacting protein isolated by the yeast two-hybrid system. *Hum Mol Genet* **6**, 487-495 (1997).
- Wilson, A. L., Erdman, R. A., Castellano, F. & Maltese, W. A. Prenylation of Rab8 GTPase by type I and type II geranylgeranyl transferases. *Biochem J* **333** ( Pt 3), 497-504 (1998).
- Yoshimura, S., Egerer, J., Fuchs, E., Haas, A. K. & Barr, F. A. Functional dissection of Rab GTPases involved in primary cilium formation. *J Cell Biol* **178**, 363-369 (2007).
- Zahraoui, A., Touchot, N., Chardin, P. & Tavitian, A. The human Rab genes encode a family of GTP-binding proteins related to yeast YPT1 and SEC4 products involved in secretion. *J Biol Chem* **264**, 12394-12401 (1989).
- Zhang, H., Seabra, M. C. & Deisenhofer, J. Crystal structure of Rab geranylgeranyltransferase at 2.0 Å resolution. *Structure* **8**, 241-251 (2000).
